# Supplementary material for: Anomalous oxidation and its effect on electrical transport originating from surface chemical instability in large-area, few-layer 1T′-MoTe2 films
Source: Royal Society of Chemistry journal article supplement (doi:10.1039/c8nr05699d), 2018-01-01
Supplement: c8nr05699d1.pdf [file c8nr05699d1.pdf]

## Supporting Information

### **Anomalous oxidation and its effect on electrical transport originating from surface chemical instability in large area, few-layer 1T'-MoTe<sub>2</sub> film**

*Li Yang,<sup>#</sup> Hao Wu,<sup>#</sup> Wenfeng Zhang,<sup>\*</sup> Zhenhua Chen, Jie Li, Xun Lou, Zijian Xie, Rui Zhu and Haixin Chang<sup>\*</sup>*

L. Yang, H. Wu, Prof. Dr. W. Zhang, J. Li, X. Lou, Z. Xie, R. Zhu and Prof. Dr. H. Chang  
Center for Joining and Electronic Packaging, State Key Laboratory of Material Processing and Die & Mould Technology, School of Materials Science and Engineering, Huazhong University of Science and Technology, Wuhan 430074, PRC.

Shenzhen R&D Center of Huazhong University of Science and Technology, Shenzhen 518000, PRC.

E-mail: wfzhang@hust.edu.cn, hxchang@hust.edu.cn

Prof. Dr. Z. Chen,

Shanghai Synchrotron Radiation Facility, Shanghai Institute of Applied Physics, Chinese Academy of Science, Shanghai 201204, PRC.

<sup>#</sup>Theses authors contributed equally to this work.

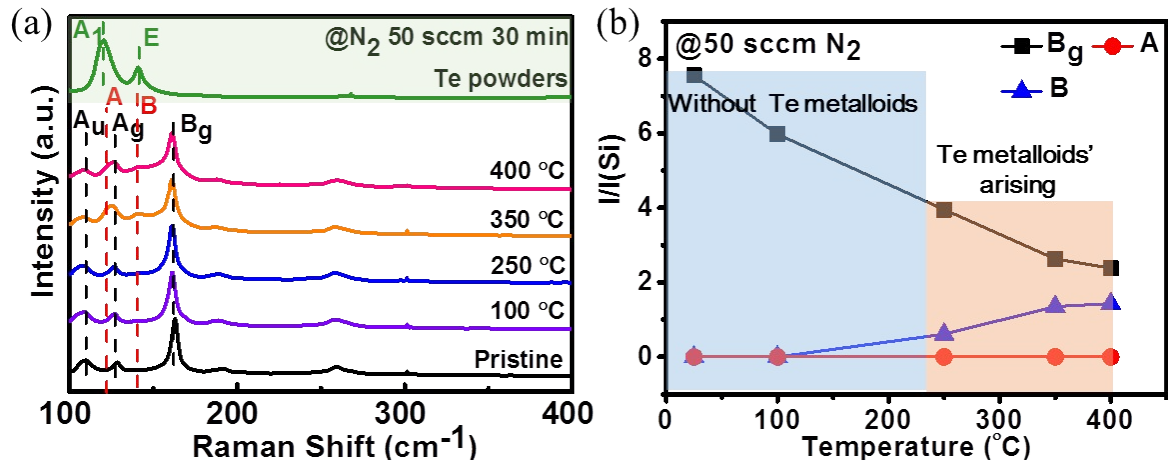

**Figure S1.** (a) Raman spectral evolution of the pristine and thermally processed few-layer 1T'-MoTe<sub>2</sub> films at the different elevated temperatures with the constant N<sub>2</sub> flow rate (50 sccm) for 30 min, respectively. (b) the corresponding intensity ratio of peak A (~123 cm<sup>-1</sup>), B (~143 cm<sup>-1</sup>) and B<sub>g</sub> (~161 cm<sup>-1</sup>) to the silicon Raman mode plotted as a function of process temperature.

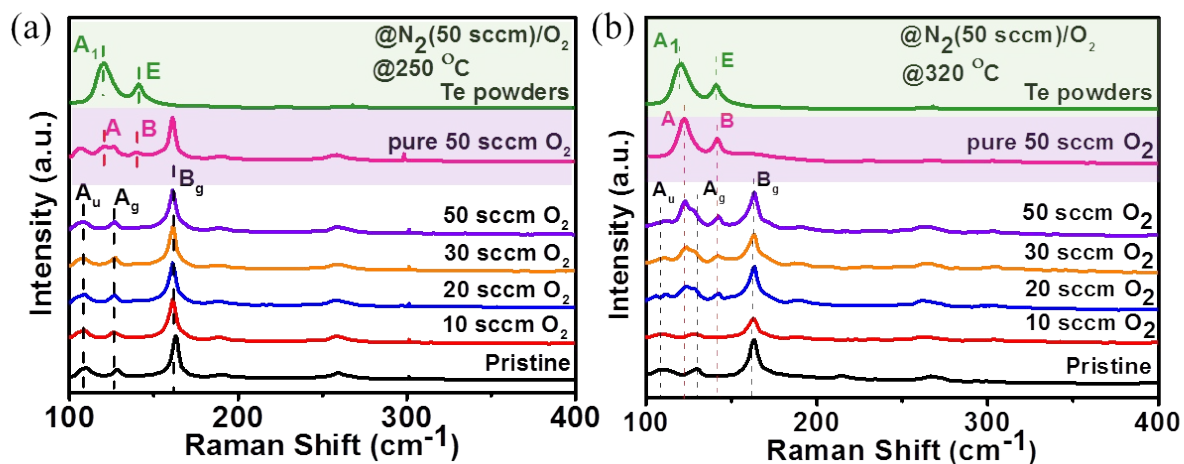

**Figure S2.** Raman spectral evolution of the pristine and thermal processed few-layer 1T'-MoTe<sub>2</sub> films at the different elevated temperatures by using the different O<sub>2</sub> gas flow rates (varying between 0, 10, 20, 30, and 50 sccm) diluted with a constant flow rates (50 sccm) of N<sub>2</sub> gas for 30 min at 250 °C (a) and 320 °C (b), respectively.

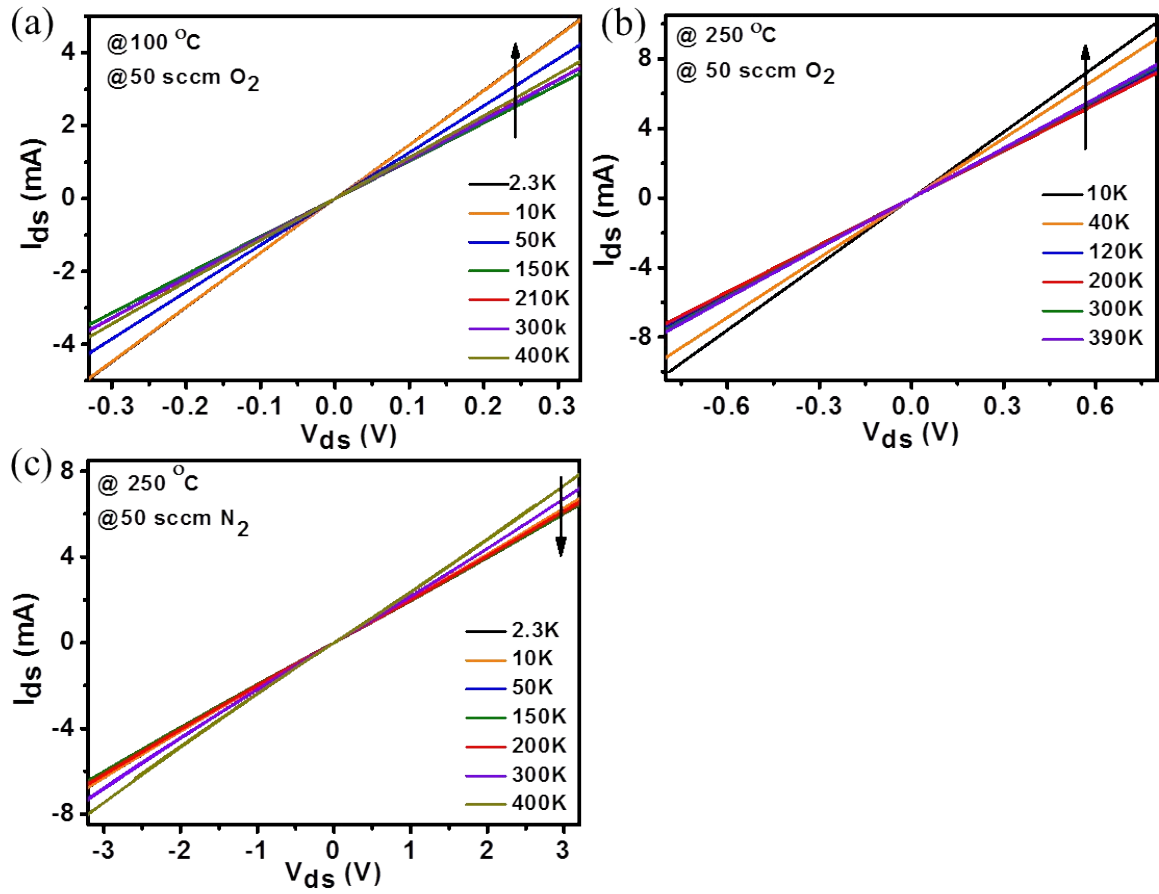

**Figure S3. Typical temperature-dependent transport measurements of few-layer 1T'-MoTe<sub>2</sub> films after the different thermal treatments.** (a) O<sub>2</sub> treatment with a constant flow rate (50 sccm) at 100 °C for 30 minutes. (b) O<sub>2</sub> treatment with a constant flow rate (50 sccm) at 250 °C for 30 minutes. (c) N<sub>2</sub> treatment with a constant flow rate (50 sccm) at 250 °C for 30 min.

**Table S1.** The full width at half maximum (FWHM) for Bg peak at  $\sim 161\text{ cm}^{-1}$  of few-layer 1T'-MoTe<sub>2</sub> before and after the different thermal treatments from the Raman phonon band analysis.

| <b>Different thermal treatments</b> | Pristine<br>1T'-MoTe <sub>2</sub> | Ambient conditions<br>(several days) | 100 °C<br>50 sccm O <sub>2</sub><br>(30 min) | 250 °C<br>50 sccm O <sub>2</sub><br>(30 min) |
|-------------------------------------|-----------------------------------|--------------------------------------|----------------------------------------------|----------------------------------------------|
| <b>FWHM (cm<sup>-1</sup>)</b>       | 4.226                             | 4.398                                | 4.413                                        | 4.404                                        |
